# Supplementary material for: New pyrazole–pyridazine hybrids as selective COX-2 inhibitors: design, synthesis, molecular docking, in silico studies and investigation of their anti-inflammatory potential by evaluation of TNF-α, IL-6, PGE-2 and NO in LPS-induced RAW264.7 macrophages
Source: Royal Society of Chemistry journal article supplement (doi:10.1039/d4md00135d), 2024-01-01
Supplement: d4md00135d1.pdf [file d4md00135d1.pdf]

## Supplementary materials

### **New pyrazole-pyridazine hybrids as selective COX-2 inhibitors: Design, synthesis, molecular docking, *in silico* studies and investigation of the anti-inflammatory potential by evaluation of TNF- $\alpha$ , IL-6, PGE-2 and NO in LPS-induced RAW264.7 macrophages**

Eman O.Osman<sup>a</sup>, Nadia A. Khalil<sup>a</sup>, Alaa Magdy<sup>a</sup>, and Yara El-Dash<sup>a</sup>

<sup>a</sup>Department of Pharmaceutical Organic Chemistry, Faculty of Pharmacy, Cairo University, Cairo, 11562, Egypt.

**Correspondence to:** Eman O. Osman, Department of Pharmaceutical Organic Chemistry, Faculty of Pharmacy, Cairo University, Cairo, 11562, Egypt.

Address: 33 Kasr El-Aini Street, Cairo, Egypt.

E-mail: [eman.osman@pharma.cu.edu.eg](mailto:eman.osman@pharma.cu.edu.eg)

Tel: 002023639307.

Fax: 002023635140.

## **Supplementary data**

(Experimental of pharamcological activity studies and molecular docking , in addition to IR, <sup>1</sup>HNMR and <sup>13</sup>CNMR spectra of new compounds)

# **1. Experimental**

## **1.1 Pharamcological activity studies**

### **1.1.1 Cell viability assay**

RAW264.7 cells (6x10<sup>3</sup> cells/per) were placed into a 96-well plate and kept for 24 h. Five different concentrations of the investigated compounds were used (100, 25, 6.3, 1.6, and 0.4 μM/L). The cells were pretreated with the different concentrations for 1 h and then incubated with LPS (0.5 μg/ml) for 24 h. To each well, MTT solution (5 mg/ml) was added and then incubated for 4 h at 37 °C. The media containing MTT was removed, then treated with 150 μL of DMSO. The absorbance was detected by a microplate reader at 500-600 nm .

## **\*Cytotoxicity results**

| <b>Code</b>      | <b>IC<sub>50</sub> (μM)</b> | <b>SD (±)</b> |
|------------------|-----------------------------|---------------|
| <b>5a</b>        | 246                         | 13            |
| <b>5b</b>        | 61.6                        | 3.2           |
| <b>5c</b>        | 100                         | 5.2           |
| <b>5d</b>        | 158                         | 8.2           |
| <b>5e</b>        | 265                         | 14            |
| <b>5f</b>        | 328                         | 17            |
| <b>6a</b>        | 311                         | 16            |
| <b>6b</b>        | 138                         | 7.2           |
| <b>6c</b>        | 97.5                        | 5.1           |
| <b>6d</b>        | 212                         | 11            |
| <b>6e</b>        | 265                         | 14            |
| <b>6f</b>        | 169                         | 8.8           |
| <b>Celecoxib</b> | 201                         | 10            |

### 1.1.2 *In vitro* COX-1 and COX-2 inhibitory assay

In this assay, celecoxib and indomethacin were used as reference medications to investigate the ability of the new compounds to suppress human COX-1 and COX-2 using ten folds serial dilutions (1, 0.1, 0.01, 0.001  $\mu\text{g}/\text{mL}$ ) (**Table 1**). This was achieved using human COX-1 and COX-2 inhibitor screening kit supplied by Cayman chemicals (catalog numbers 701,070 and 701080, respectively, Ann Arbor, MI, USA). Dimethylsulfoxide (DMSO) was used to solubilize the new derivatives. Briefly, a mixture containing COX-1 or COX-2 enzyme (10  $\mu\text{L}$ ), heme (10  $\mu\text{L}$ ) and DMSO solutions of tested compounds samples (20  $\mu\text{L}$ ) was added to the supplied reaction buffer solution [160  $\mu\text{L}$ , 0.1 M Tris–HCl, pH 8 containing 5 mM ethylenediamine tetra acetate (EDTA) and 2 mM phenol] then incubated for 10 min at 37 °C. Meanwhile, arachidonic acid was added (10  $\mu\text{L}$ ). To initiate the reaction, the final reaction mixture concentration was 100  $\mu\text{M}$ . Later, stannous chloride (30  $\mu\text{L}$ ) was added to stop the COX reactions, then incubated at an ambient temperature for 5 min. Thereafter, quantification of  $\text{PGF}_{2\alpha}$  produced in the samples by COX reactions was carried out by adopting an enzyme-linked immunosorbent assay (ELISA). The samples were transferred to a 96-well plate and then incubated at room temperature for 18 h. Any unbound reagent was removed by washing. Ellman's reagent (200  $\mu\text{L}$ ) was added and incubated for 60–90 min at room temperature. Finally, the plate was read by an ELISA plate reader, and the  $\text{IC}_{50}$  values for inhibition of both COX-1 and COX-2 enzymes were determined.

## COX-1



| Code | IC <sub>50</sub> | Conc. | Log | % Inhibition | K activity |
|------|------------------|-------|-----|--------------|------------|
| 5a   | 20.11            | 100   | 2   | 65           | 42.0402    |
|      |                  | 10    | 1   | 33.2         | 80.192     |
|      |                  | 1     | 0   | 12.6         | 10.938     |
|      |                  | 0.1   | -1  | 6.33         | 112.343    |
| EC   |                  |       |     | 0            | 120        |



## COX-2



| Code | IC <sub>50</sub> | Conc. | Log | % Inhibition | K activity |
|------|------------------|-------|-----|--------------|------------|
| 5a   | 5.40             | 100   | 2   | 80.4         | 23.4623    |
|      |                  | 10    | 1   | 50.3         | 59.682     |
|      |                  | 1     | 0   | 92.6253      | 97.6658    |
|      |                  | 0.1   | -1  | 8.56         | 109.727    |
| EC   |                  |       |     | 0            | 120        |



## COX-1



| Code | IC <sub>50</sub> | Conc. | Log | % Inhibition | K activity |
|------|------------------|-------|-----|--------------|------------|
| 5b   | 4.58             | 100   | 2   | 73.9         | 34.2874    |
|      |                  | 10    | 1   | 40.5         | 76.2196    |
|      |                  | 1     | 0   | 21.4         | 97.4377    |
|      |                  | 0.1   | -1  | 8.96         | 111.203    |
| EC   |                  |       |     | 0            | 120        |



## COX-2



| Code | IC <sub>50</sub> | Conc. | Log | % Inhibition | K activity |
|------|------------------|-------|-----|--------------|------------|
| 5b   | 4.58             | 100   | 2   | 68.4         | 37.3638    |
|      |                  | 10    | 1   | 17.4         | 99.1659    |
|      |                  | 1     | 0   | 7.43         | 111.083    |
|      |                  | 0.1   | -1  | 2.38         | 117.144    |
| EC   |                  |       |     | 0            | 120        |



## COX-1



| Code | IC <sub>50</sub> | Conc. | Log | % Inhibition | K activity |
|------|------------------|-------|-----|--------------|------------|
| 5c   | 18.00            | 100   | 2   | 69           | 37.2277    |
|      |                  | 10    | 1   | 30.1         | 83.8644    |
|      |                  | 1     | 0   | 13.5         | 103.858    |
|      |                  | 0.1   | -1  | 7.52         | 110.975    |
| EC   |                  |       |     | 0            | 120        |



## COX-2



| Code | IC <sub>50</sub> | Conc. | Log | % Inhibition | K activity |
|------|------------------|-------|-----|--------------|------------|
| 5c   | 9.04             | 100   | 2   | 83.2         | 20.15      |
|      |                  | 10    | 1   | 58.1         | 50.309     |
|      |                  | 1     | 0   | 37.4         | 75.1395    |
|      |                  | 0.1   | -1  | 13.5         | 103.846    |
| EC   |                  |       |     | 0            | 120        |



## COX-1



## COX-2



| Code | IC <sub>50</sub> | Conc. | Log | % Inhibition | K activity |
|------|------------------|-------|-----|--------------|------------|
| 5d   | 4.15             | 100   | 2   | 65.5         | 41.4281    |
|      |                  | 10    | 1   | 29           | 85.2445    |
|      |                  | 1     | 0   | 10.5         | 107.459    |
|      |                  | 0.1   | -1  | 6.3          | 112.439    |
| EC   |                  |       |     | 0            | 120        |

| Code | IC <sub>50</sub> | Conc. | Log  | % Inhibition | K activity |
|------|------------------|-------|------|--------------|------------|
| 5d   | 20.71            | 100   | 2    | 80.5         | 23.4143    |
|      |                  | 10    | 1    | 41.8         | 69.835     |
|      |                  | 1     | 0    | 23           | 92.3972    |
|      |                  | 0.1   | 7.94 | 35.2         | 110.471    |
| EC   |                  |       |      | 0            | 120        |



## COX-1



| Code | IC <sub>50</sub> | Conc. | Log | % Inhibition | K activity |
|------|------------------|-------|-----|--------------|------------|
| 5e   | 2.42             | 100   | 2   | 81.4         | 22.3342    |
|      |                  | 10    | 1   | 56.4         | 52.3372    |
|      |                  | 1     | 0   | 28.5         | 85.8326    |
|      |                  | 0.1   | -1  | 10.8         | 107.003    |
| EC   |                  |       |     | 0            | 120        |



## COX-2



| Code | IC <sub>50</sub> | Conc. | Log | % Inhibition | K activity |
|------|------------------|-------|-----|--------------|------------|
| 5e   | 3.92             | 100   | 2   | 84.2         | 18.9019    |
|      |                  | 10    | 1   | 62.2         | 45.3885    |
|      |                  | 1     | 0   | 43.7         | 67.5428    |
|      |                  | 0.1   | -1  | 18.4         | 97.9178    |
| EC   |                  |       |     | 0            | 120        |



## COX-1



| Code | IC <sub>50</sub> | Conc. | Log  | % Inhibition | K activity |
|------|------------------|-------|------|--------------|------------|
| 5f   | 14.38            | 100   | 2    | 77.4         | 27.0987    |
|      |                  | 10    | 1    | 42.1         | 69.4989    |
|      |                  | 1     | 12.6 | 28.1         | 86.2286    |
|      |                  | 0.1   | -1   | 11.4         | 106.343    |
| EC   |                  |       |      | 0            | 120        |



## COX-2



| Code | IC <sub>50</sub> | Conc. | Log | % Inhibition | K activity |
|------|------------------|-------|-----|--------------|------------|
| 5f   | 1.50             | 100   | 2   | 91.2         | 10.6091    |
|      |                  | 10    | 1   | 75.4         | 29.535     |
|      |                  | 1     | 0   | 44.6         | 66.4746    |
|      |                  | 0.1   | -1  | 27.6         | 86.9367    |
| EC   |                  |       |     | 0            | 120        |



## COX-1



| Code | IC <sub>50</sub> | Conc. | Log  | % Inhibition | K activity |
|------|------------------|-------|------|--------------|------------|
| 6a   | 35.95            | 100   | 2    | 70.4         | 35.4635    |
|      |                  | 10    | 1    | 36.9         | 75.6796    |
|      |                  | 1     | 12.6 | 18.5         | 97.7618    |
|      |                  | 0.1   | -1   | 7.38         | 111.143    |
| EC   |                  |       |      | 0            | 120        |



## COX-2



| Code | IC <sub>50</sub> | Conc. | Log | % Inhibition | K activity |
|------|------------------|-------|-----|--------------|------------|
| 6a   | 7.76             | 100   | 2   | 81.8         | 21.7942    |
|      |                  | 10    | 1   | 54.4         | 54.7375    |
|      |                  | 1     | 0   | 30.3         | 83.6244    |
|      |                  | 0.1   | -1  | 11.6         | 106.127    |
| EC   |                  |       |     | 0            | 120        |



## COX-1



## COX-2



| Code | IC <sub>50</sub> | Conc. | Log  | % Inhibition | K activity |
|------|------------------|-------|------|--------------|------------|
| 6b   | 19.29            | 100   | 2    | 82.1         | 21.4341    |
|      |                  | 10    | 1    | 55.4         | 53.5014    |
|      |                  | 1     | 12.6 | 33           | 80.444     |
|      |                  | 0.1   | -1   | 15.1         | 101.902    |
| EC   |                  |       |      | 0            | 120        |

| Code | IC <sub>50</sub> | Conc. | Log | % Inhibition | K activity |
|------|------------------|-------|-----|--------------|------------|
| 6b   | 56.3             | 100   | 2   | 77           | 27.6268    |
|      |                  | 10    | 1   | 43.6         | 67.7228    |
|      |                  | 1     | 0   | 17.5         | 99.0219    |
|      |                  | 0.1   | -1  | 3.43         | 115.884    |
| EC   |                  |       |     | 0            | 120        |



## COX-1



## COX-2



| Code | IC <sub>50</sub> | Conc. | Log | % Inhibition | K activity |
|------|------------------|-------|-----|--------------|------------|
| 6c   | 31.20            | 100   | 2   | 71.6         | 34.0954    |
|      |                  | 10    | 1   | 39           | 73.2553    |
|      |                  | 1     | 0   | 17.5         | 99.0219    |
|      |                  | 0.1   | -1  | 6.56         | 112.127    |
| EC   |                  |       |     | 0            | 120        |

| Code | IC <sub>50</sub> | Conc. | Log | % Inhibition | K activity |
|------|------------------|-------|-----|--------------|------------|
| 6c   | 3.85             | 100   | 2   | 80.1         | 23.9064    |
|      |                  | 10    | 1   | 47.4         | 63.1383    |
|      |                  | 1     | 0   | 20.4         | 95.5776    |
|      |                  | 0.1   | -1  | 7.53         | 110.963    |
| EC   |                  |       |     | 0            | 120        |



## COX-1



| Code | IC <sub>50</sub> | Conc. | Log | % Inhibition | K activity |
|------|------------------|-------|-----|--------------|------------|
| 6d   | 42.91            | 100   | 2   | 80.9         | 22.9703    |
|      |                  | 10    | 1   | 58.1         | 50.261     |
|      |                  | 1     | 0   | 32.5         | 81.0321    |
|      |                  | 0.1   | -1  | 18.5         | 97.8218    |
| EC   |                  |       |     | 0            | 120        |



## COX-2



| Code | IC <sub>50</sub> | Conc. | Log | % Inhibition | K activity |
|------|------------------|-------|-----|--------------|------------|
| 6d   | 9.87             | 100   | 2   | 72.5         | 33.0153    |
|      |                  | 10    | 1   | 34.2         | 78.9919    |
|      |                  | 1     | 0   | 16.5         | 100.222    |
|      |                  | 0.1   | -1  | 4.3          | 114.839    |
| EC   |                  |       |     | 0            | 120        |



## COX-1



## COX-2



| Code | IC <sub>50</sub> | Conc. | Log  | % Inhibition | K activity |
|------|------------------|-------|------|--------------|------------|
| 6e   | 5.48             | 100   | 2    | 83.6         | 19.634     |
|      |                  | 10    | 1    | 61.4         | 46.3366    |
|      |                  | 1     | 12.6 | 44.2         | 66.9547    |
|      |                  | 0.1   | -1   | 20.4         | 95.5416    |
| EC   |                  |       |      | 0            | 120        |

| Code | IC <sub>50</sub> | Conc. | Log  | % Inhibition | K activity |
|------|------------------|-------|------|--------------|------------|
| 6e   | 2.51             | 100   | 2    | 88.5         | 13.8254    |
|      |                  | 10    | 63.5 | 83           | 43.8284    |
|      |                  | 1     | 0    | 27.5         | 87.0207    |
|      |                  | 0.1   | -1   | 10.4         | 107.543    |
| EC   |                  |       |      | 0            | 120        |



## COX-1



| Code | IC <sub>50</sub> | Conc. | Log  | % Inhibition | K activity |
|------|------------------|-------|------|--------------|------------|
| 6f   | 9.61             | 100   | 2    | 76.5         | 28.2148    |
|      |                  | 10    | 1    | 37.8         | 74.5995    |
|      |                  | 1     | 12.6 | 18.4         | 97.9178    |
|      |                  | 0.1   | -1   | 8.52         | 109.775    |
| EC   |                  |       |      | 0            | 120        |



## COX-2



| Code | IC <sub>50</sub> | Conc. | Log | % Inhibition | K activity |
|------|------------------|-------|-----|--------------|------------|
| 6f   | 1.15             | 100   | 2   | 92.3         | 9.25293    |
|      |                  | 10    | 1   | 70.2         | 35..7756   |
|      |                  | 1     | 0   | 45.3         | 65.6706    |
|      |                  | 0.1   | -1  | 22.5         | 92.9973    |
| EC   |                  |       |     | 0            | 120        |



## COX-1



## COX-2



| Code         | IC <sub>50</sub> | Conc. | Log | % Inhibition | K activity |
|--------------|------------------|-------|-----|--------------|------------|
| Indomethacin | 0.43             | 100   | 2   | 93.2         | 8.25683    |
|              |                  | 10    | 1   | 81.1         | 22.7303    |
|              |                  | 1     | 0   | 57.7         | 50.7531    |
|              |                  | 0.1   | -1  | 35.5         | 77.4557    |
| EC           |                  |       |     | 0            | 120        |

| Code         | IC <sub>50</sub> | Conc. | Log | % Inhibition | K activity |
|--------------|------------------|-------|-----|--------------|------------|
| Indomethacin | 1.22             | 100   | 2   | 92.5         | 9.0129     |
|              |                  | 10    | 1   | 77.4         | 27.1587    |
|              |                  | 1     | 0   | 45.3         | 65.6346    |
|              |                  | 0.1   | -1  | 24.1         | 91.1131    |
| EC           |                  |       |     | 0            | 120        |



## COX-1



## COX-2



| Code      | IC <sub>50</sub> | Conc. | Log | % Inhibition | K activity |
|-----------|------------------|-------|-----|--------------|------------|
| Celecoxib | 5.43             | 100   | 2   | 81.8         | 21.8542    |
|           |                  | 10    | 1   | 55.5         | 53.4413    |
|           |                  | 1     | 0   | 28.7         | 85.5206    |
|           |                  | 0.1   | -1  | 11.7         | 105.983    |
| EC        |                  |       |     | 0            | 120        |

| Code      | IC <sub>50</sub> | Conc. | Log | % Inhibition | K activity |
|-----------|------------------|-------|-----|--------------|------------|
| Celecoxib | 2.16             | 100   | 2   | 87.7         | 14.7975    |
|           |                  | 10    | 1   | 70.2         | 35.7516    |
|           |                  | 1     | 0   | 36.7         | 75.9196    |
|           |                  | 0.1   | -1  | 20.8         | 95.0255    |
| EC        |                  |       |     | 0            | 120        |



### **1.1.3 Inhibition of TNF- $\alpha$ , IL-6, and PGE-2 expression in LPS-induced RAW264.7 cell**

RAW 264.7 cells were incubated in 96 well-plates ( $5 \times 10^3$  cells/well) in 5% CO<sub>2</sub> at 37 °C for 24 h. Thereafter, the cells were treated with the tested compounds (50  $\mu$ M) in the presence of LPS (1  $\mu$ g/mL). The untreated cells, acted as the blank control, whereas the negative control group (LPS group) was represented by the treated cells with LPS + DMSO (final concentration of 0.1% (v/v)). TNF- $\alpha$ , PGE-2, and IL-6 were quantified 24 h after treatment, utilizing specified ELISA kits.

### **1.1.4 Inhibition of NO expression LPS-induced RAW264.7 cells**

Aiming to measure NO expression in the culture medium, RAW264.7 cells pretreated with the test compounds for 2 h were treated with LPS (1  $\mu$ g/mL) for 24 h. To the culture medium (100 L), Griess reagent (100 L) (Sigma-Aldrich, St. Louis, MO, USA) was added, then incubated at room temperature for 10 min. ELISA reader at 540 nm was used to measure the optical density (OD) as an indicator of NO.

## **1.2 Molecular docking of compounds 5f, 6e and 6f in the active site of COX-2**

Molecular Operating Environment (MOE Version 2015.10) software was used to study the molecular modeling for the new active compounds **5f**, **6e** and **6f**. The COX-2 enzyme X-ray crystal structure (PDB entry 3LN1) was downloaded from the RCSB protein data bank website (<http://www.rcsb.org>). Aiming to prepare protein structure, the repeating chains and water molecules were removed from the enzyme active site. Protonate 3D process was applied to add hydrogen atoms to the atoms of the receptor. The determined pocket was isolated, and the partial charges were calculated. Hiding backbone was performed to give a final prepared protein. Before performing the docking, the tested compounds and celecoxib were prepared automatically by certain steps including 3D protonation, calculating partial charges and minimizing energy with Merck Molecular force field.

Ligands were outlined using ChemDraw office (ChemDraw office version 12.0.2) and saved as mol extension, then prepared by protonation and energy minimization.

## 2.7. Physicochemical, ADME, and pharmacokinetic properties in *silico* prediction

The BOILED-Egg graphical representation of the WLOGP vs. topological polar surface area for the tested compounds



### 3. IR, <sup>1</sup>H NMR and <sup>13</sup>C NMR spectra of the new derivatives.

IR of compound 3



3

# <sup>1</sup>H NMR of **3** in DMSO



D<sub>2</sub>O of 3



# $^{13}\text{C}$ NMR of **3** in DMSO



# IR of compound 4



Alaa Magdy\_H\_ECA.10.fid  
Alaa Magdy\_H\_ECA

# $^1\text{H}$ NMR of **4** in DMSO



Alaa Magdy\_H\_Cr-ECANH2\_D2O.10.fid  
Alaa Magdy\_H\_Cr-ECANH2\_D2O

D<sub>2</sub>O of 4



# $^{13}\text{C}$ NMR of **4** in DMSO



# IR of compound 5a



**5a**

alaa-magdy-5a/1  
Nagham Hussien\_C\_C6

**<sup>1</sup>H NMR of 5a in DMSO**



# D<sub>2</sub>O of 5a



# $^{13}\text{C}$ NMR of **5a** in DMSO



# IR of compound 5b



MAU



Alaa Magdy ECA ald. 1



5b

# $^1\text{H}$ NMR of **5b** in DMSO



# D<sub>2</sub>O of 5b



Alaa Magdy\_C\_Cr-ECA-ald-1

# $^{13}\text{C}$ NMR of **5b** in DMSO



# IR of compound 5c



5c

Dr- Alaa Magdy ECA ald. 3

8.7126  
8.7114  
8.1072  
7.9082  
7.8877  
7.7456  
7.7214  
7.5913  
7.5712  
7.4831  
7.4607  
7.4587

**<sup>1</sup>H NMR of 5c in DMSO**



D<sub>2</sub>O of 5c



# $^{13}\text{C}$ NMR of **5c** in DMSO



# IR of compound 5d



**MAU**  
Microanalytical Unit-FOPCU  
وحدة التحليل الدقيقة  
معمل الأشعة تحت الحمراء

SHIMADZU



Comment:

No. of Scans; 8

Date/Time: 8/3/2021 9:49:01 AM

Dr/ Alaa Magdy ECA ald.2

Resolution; 8 [1/cm]

User: usama

# <sup>1</sup>H NMR of **5d** in DMSO



D<sub>2</sub>O of 5d



# $^{13}\text{C}$ NMR of **5d** in DMSO



# IR of compound 5e



Dr- Alaa Moady ECA ald- 4

Alaa Magdy\_H\_Cr-ECA-ald-4

# $^1\text{H}$ NMR of **5e** in DMSO



# D<sub>2</sub>O of 5e



Alaa Magdy\_C\_Cr-ECA-Ald-4

# $^{13}\text{C}$ NMR of **5e** in DMSO



# IR of compound 5f



# <sup>1</sup>H NMR of **5f** in **DMSO**



# D<sub>2</sub>O of 5f



# $^{13}\text{C}$ NMR of **5f** in DMSO



# IR of compound 6a





# D<sub>2</sub>O of 6a



# $^{13}\text{C}$ NMR of **6a** in DMSO



# IR of compound 6b



Dr/ Alaa Magdy MN ald. 1

Scanned with CamScanner

Alaa Magdy\_H\_a-MN-ald1

# <sup>1</sup>H NMR of **6b** in DMSO



# D<sub>2</sub>O of 6b

Alaa Magdy\_H\_a-MN-ald1\_D2O.10.fid  
Alaa Magdy\_H\_a-MN-ald1\_D2O



Alaa Magdy\_C\_a-MN-ald1.10.fid  
Alaa Magdy\_C\_a-MN-ald1

# $^{13}\text{C}$ NMR of **6b** in DMSO



# IR of compound 6c



# <sup>1</sup>H NMR of 6c in DMSO

Alaa Magdy\_H\_Cr-MN-ald-3.10.fid  
Alaa Magdy\_H\_Cr-MN-ald-3



# D<sub>2</sub>O of 6c

Alaa Magdy\_H\_Cr-MN-Ald3\_D2O.10.fid  
Alaa Magdy\_H\_Cr-MN-Ald3\_D2O



# $^{13}\text{C}$ NMR of **6c** in DMSO

Alaa Magdy\_C\_Cr-MN-Ald3.10.fid  
Alaa Magdy\_C\_Cr-MN-Ald3



# IR of compound 6d



**<sup>1</sup>H NMR of 6d in DMSO**



# D<sub>2</sub>O of 6d

Alaa Magdy\_H\_Cr-MN-ald-2\_D2O



# $^{13}\text{C}$ NMR of **6d** in DMSO

Alaa Magdy\_C\_Cr-MN-ald-2.10.fid  
Alaa Magdy\_C\_Cr-MN-ald-2



# IR of compound 6e



# $^1\text{H}$ NMR of **6e** in DMSO

Alaa Magdy\_H\_Cr-MN-ald4.10.fid  
Alaa Magdy\_H\_Cr-MN-ald4



# D<sub>2</sub>O of 6e

Alaa Magdy\_H\_Cr-MN-ald4\_D2O.10.fid  
Alaa Magdy\_H\_Cr-MN-ald4\_D2O



# $^{13}\text{C}$ NMR of **6e** in DMSO

Alaa Magdy\_C\_Cr-MN-ald4.10.fid  
Alaa Magdy\_C\_Cr-MN-ald4



# IR of compound 6f



# $^1\text{H}$ NMR of **6f** in DMSO

Alaa Magdy\_H\_Cr-MN-ald-6.10.fid  
Alaa Magdy\_H\_Cr-MN-ald-6



# D<sub>2</sub>O of 6f

Alaa Magdy\_H\_Cr-MN-ald-6\_D2O.10.fid  
Alaa Magdy\_H\_Cr-MN-ald-6\_D2O



# $^{13}\text{C}$ NMR of **6f** in DMSO
